# Supplementary material for: Theoretical Studies of Intracellular Concentration of Micro-organisms’ Metabolites
Source: PubMed Central journal article supplement (PMC5567373; doi:10.1038/s41598-017-08793-2), 2017-08-22

|                           |        |   |   |   |   |   |   |          |
|---------------------------|--------|---|---|---|---|---|---|----------|
| GTP                       | C00044 | 0 | 0 | 0 | 0 | 1 | 1 | 4.87E-03 |
| Lysine                    | C00047 | 0 | 0 | 0 | 0 | 0 | 0 | 4.05E-04 |
| Aspartate                 | C00049 | 0 | 1 | 0 | 0 | 0 | 1 | 4.23E-03 |
| Glutathione               | C00051 | 0 | 0 | 0 | 0 | 0 | 0 | 1.66E-02 |
| CMP                       | C00055 | 0 | 0 | 0 | 0 | 0 | 0 | 3.60E-04 |
| Flavin mononucleotide     | C00061 | 0 | 0 | 0 | 0 | 0 | 0 | 5.37E-05 |
| Arginine                  | C00062 | 0 | 0 | 0 | 0 | 0 | 0 | 5.69E-04 |
| CTP                       | C00063 | 0 | 0 | 0 | 0 | 0 | 0 | 2.73E-03 |
| Glutamine                 | C00064 | 0 | 0 | 1 | 0 | 0 | 1 | 3.81E-03 |
| Serine                    | C00065 | 0 | 0 | 0 | 0 | 0 | 0 | 6.80E-05 |
| Methionine                | C00073 | 0 | 0 | 0 | 0 | 0 | 0 | 1.45E-04 |
| Phosphoenolpyruvate       | C00074 | 0 | 0 | 0 | 0 | 0 | 0 | 1.84E-04 |
| UTP                       | C00075 | 0 | 0 | 0 | 0 | 0 | 0 | 8.29E-03 |
| Ornithine                 | C00077 | 0 | 0 | 0 | 0 | 0 | 0 | 1.01E-05 |
| Tryptophan                | C00078 | 0 | 0 | 0 | 0 | 0 | 0 | 1.21E-05 |
| Phenylalanine             | C00079 | 0 | 0 | 0 | 0 | 0 | 0 | 1.82E-05 |
| Inosine-triphosphate      | C00081 | 0 | 0 | 0 | 0 | 0 | 0 | 2.05E-04 |
| Tyrosine                  | C00082 | 0 | 0 | 0 | 0 | 0 | 0 | 2.89E-05 |
| Malonyl-CoA               | C00083 | 0 | 0 | 0 | 0 | 0 | 0 | 3.54E-05 |
| Succinyl-CoA              | C00091 | 0 | 1 | 0 | 0 | 0 | 1 | 2.33E-04 |
| Propionyl-CoA             | C00100 | 0 | 0 | 0 | 0 | 0 | 0 | 5.32E-06 |
| Inosine-diphosphate       | C00104 | 0 | 0 | 0 | 0 | 0 | 0 | 2.38E-05 |
| Anthranilate              | C00108 | 0 | 0 | 0 | 0 | 0 | 0 | 3.48E-06 |
| Dihydroxyacetonephosphate | C00111 | 0 | 0 | 0 | 0 | 0 | 0 | 3.74E-04 |
| PRPP                      | C00119 | 0 | 0 | 0 | 0 | 0 | 0 | 2.58E-04 |
| Fumarate                  | C00122 | 0 | 0 | 1 | 0 | 0 | 1 | 1.15E-04 |
| Glutathione disulfide     | C00127 | 0 | 0 | 0 | 0 | 0 | 0 | 2.37E-03 |
| Inosine-monophosphate     | C00130 | 0 | 0 | 0 | 0 | 0 | 0 | 2.72E-04 |
| dATP                      | C00131 | 0 | 0 | 0 | 0 | 0 | 0 | 1.55E-05 |
| Histidine                 | C00135 | 0 | 0 | 0 | 0 | 0 | 0 | 6.76E-05 |
| Myo-inositol              | C00137 | 0 | 0 | 0 | 0 | 0 | 0 | 5.72E-06 |
| GMP                       | C00144 | 0 | 0 | 0 | 0 | 0 | 0 | 2.37E-05 |
| Adenine                   | C00147 | 0 | 0 | 0 | 0 | 0 | 0 | 1.47E-06 |
| Proline                   | C00148 | 0 | 0 | 0 | 0 | 0 | 0 | 3.85E-04 |
| Malate                    | C00149 | 0 | 0 | 1 | 0 | 0 | 1 | 1.68E-03 |
| Asparagine                | C00152 | 0 | 0 | 0 | 0 | 0 | 0 | 5.11E-04 |
| Homocysteine              | C00155 | 0 | 0 | 0 | 0 | 0 | 0 | 3.70E-04 |
| 4-Hydroxybenzoate         | C00156 | 0 | 0 | 0 | 0 | 0 | 0 | 5.22E-05 |
| Citrate                   | C00158 | 0 | 0 | 1 | 0 | 0 | 1 | 1.96E-03 |



|                                |        |   |   |   |   |   |   |          |
|--------------------------------|--------|---|---|---|---|---|---|----------|
| NADH                           | C00004 | 0 | 0 | 0 | 0 | 0 | 0 | 4.50E-04 |
| ADP                            | C00008 | 0 | 0 | 0 | 0 | 0 | 0 | 6.30E-04 |
| AMP                            | C00020 | 0 | 0 | 0 | 0 | 0 | 0 | 1.60E-04 |
| Pyruvate                       | C00022 | 0 | 0 | 0 | 0 | 0 | 0 | 1.24E-03 |
| L-Glutamate                    | C00025 | 0 | 0 | 1 | 0 | 0 | 1 | 8.18E-02 |
| 2-Oxoglutarate                 | C00026 | 0 | 0 | 0 | 0 | 0 | 0 | 1.11E-03 |
| GDP                            | C00035 | 0 | 0 | 0 | 0 | 0 | 0 | 2.20E-04 |
| L-Alanine                      | C00041 | 0 | 0 | 0 | 0 | 1 | 1 | 2.47E-02 |
| Succinate                      | C00042 | 1 | 0 | 0 | 0 | 0 | 1 | 3.40E-04 |
| GTP                            | C00044 | 0 | 0 | 0 | 0 | 1 | 1 | 5.90E-04 |
| L-Aspartate                    | C00049 | 0 | 1 | 0 | 0 | 0 | 1 | 1.57E-02 |
| L-Arginine                     | C00062 | 0 | 0 | 0 | 0 | 0 | 0 | 3.58E-02 |
| L-Glutamine                    | C00064 | 0 | 0 | 1 | 0 | 0 | 1 | 8.04E-02 |
| Phosphoenolpyruvate            | C00074 | 0 | 0 | 0 | 0 | 0 | 0 | 1.90E-04 |
| L-Tryptophan                   | C00078 | 0 | 0 | 0 | 0 | 0 | 0 | 3.00E-05 |
| L-Phenylalanine                | C00079 | 0 | 0 | 0 | 0 | 0 | 0 | 3.50E-04 |
| L-Tyrosine                     | C00082 | 0 | 0 | 0 | 0 | 0 | 0 | 1.60E-04 |
| D-Fructose 6-phosphate         | C00085 | 0 | 0 | 0 | 0 | 0 | 0 | 3.20E-04 |
| D-Glucose 6-phosphate          | C00092 | 0 | 0 | 1 | 0 | 0 | 1 | 3.70E-03 |
| sn-Glycerol 3-phosphate        | C00093 | 0 | 0 | 0 | 0 | 0 | 0 | 5.00E-04 |
| D-Glucose 1-phosphate          | C00103 | 0 | 0 | 0 | 0 | 0 | 0 | 9.00E-05 |
| Glycerone phosphate            | C00111 | 0 | 0 | 0 | 0 | 0 | 0 | 7.20E-04 |
| D-Ribose 5-phosphate           | C00117 | 0 | 0 | 0 | 0 | 0 | 0 | 4.10E-04 |
| Fumarate                       | C00122 | 0 | 0 | 1 | 0 | 0 | 1 | 1.65E-03 |
| GMP                            | C00144 | 0 | 0 | 0 | 0 | 0 | 0 | 6.00E-05 |
| Adenine                        | C00147 | 0 | 0 | 0 | 0 | 0 | 0 | 5.00E-05 |
| Malate                         | C00149 | 0 | 0 | 1 | 0 | 0 | 1 | 1.68E-03 |
| L-Asparagine                   | C00152 | 0 | 0 | 0 | 0 | 0 | 0 | 4.66E-03 |
| Citrate                        | C00158 | 0 | 0 | 1 | 0 | 0 | 1 | 1.47E-03 |
| 3-Phospho-D-glycerate          | C00197 | 0 | 0 | 0 | 0 | 0 | 0 | 8.90E-04 |
| D-Ribulose 5-phosphate         | C00199 | 0 | 0 | 0 | 0 | 0 | 0 | 2.00E-05 |
| Isocitrate                     | C00311 | 0 | 0 | 0 | 0 | 0 | 0 | 1.90E-04 |
| 6-Phospho-D-gluconate          | C00345 | 0 | 0 | 0 | 0 | 0 | 0 | 8.70E-04 |
| D-Fructose<br>1,6-bisphosphate | C00354 | 0 | 0 | 0 | 0 | 0 | 0 | 8.76E-03 |
| Pantothenate                   | C00864 | 0 | 0 | 0 | 0 | 0 | 0 | 2.10E-04 |

**Table S2. Information of selected pathways in training set and test set.**

|                       | Organism | Metabolite               | KEGG ID | Map 00625 | Map 00626 | Map 02020 | Map 03070 | Map 04122 | MPF |
|-----------------------|----------|--------------------------|---------|-----------|-----------|-----------|-----------|-----------|-----|
| Training Set          | E.coli   | ATP                      | C00002  | 0         | 0         | 0         | 1         | 0         | 1   |
|                       |          | NAD                      | C00003  | 0         | 0         | 0         | 0         | 0         | 0   |
|                       |          | NADH                     | C00004  | 0         | 0         | 0         | 0         | 0         | 0   |
|                       |          | ADP                      | C00008  | 0         | 0         | 0         | 0         | 0         | 0   |
|                       |          | Coenzyme-A               | C00010  | 0         | 0         | 0         | 0         | 0         | 0   |
|                       |          | UDP                      | C00015  | 0         | 0         | 0         | 0         | 0         | 0   |
|                       |          | FAD                      | C00016  | 0         | 0         | 0         | 0         | 0         | 0   |
|                       |          | AMP                      | C00020  | 0         | 0         | 0         | 0         | 0         | 0   |
|                       |          | Acetyl-CoA               | C00024  | 1         | 0         | 0         | 0         | 0         | 1   |
|                       |          | Glutamate                | C00025  | 0         | 0         | 1         | 0         | 0         | 1   |
|                       |          | $\alpha$ -Ketoglutarate  | C00026  | 0         | 0         | 0         | 0         | 0         | 0   |
|                       |          | UDP-glucose              | C00029  | 0         | 0         | 0         | 0         | 0         | 0   |
|                       |          | Alanine                  | C00041  | 0         | 0         | 0         | 0         | 1         | 1   |
|                       |          | UDP-N-acetyl-glucosamine | C00043  | 0         | 0         | 0         | 0         | 0         | 0   |
|                       |          | GTP                      | C00044  | 0         | 0         | 0         | 0         | 1         | 1   |
|                       |          | lysine                   | C00047  | 0         | 0         | 0         | 0         | 0         | 0   |
|                       |          | Aspartate                | C00049  | 0         | 1         | 0         | 0         | 0         | 1   |
|                       |          | Glutathione              | C00051  | 0         | 0         | 0         | 0         | 0         | 0   |
|                       |          | CMP                      | C00055  | 0         | 0         | 0         | 0         | 0         | 0   |
|                       |          | Flavin mononucleotide    | C00061  | 0         | 0         | 0         | 0         | 0         | 0   |
|                       |          | Arginine                 | C00062  | 0         | 0         | 0         | 0         | 0         | 0   |
|                       |          | CTP                      | C00063  | 0         | 0         | 0         | 0         | 0         | 0   |
|                       |          | Methionine               | C00073  | 0         | 0         | 0         | 0         | 0         | 0   |
|                       |          | Phosphoenol- pyruvate    | C00074  | 0         | 0         | 0         | 0         | 0         | 0   |
|                       |          | UTP                      | C00075  | 0         | 0         | 0         | 0         | 0         | 0   |
|                       |          | Ornithine                | C00077  | 0         | 0         | 0         | 0         | 0         | 0   |
|                       |          | Inosine-triphosphate     | C00081  | 0         | 0         | 0         | 0         | 0         | 0   |
|                       |          | Tyrosine                 | C00082  | 0         | 0         | 0         | 0         | 0         | 0   |
|                       |          | Malonyl-CoA              | C00083  | 0         | 0         | 0         | 0         | 0         | 0   |
|                       |          | Succinyl-CoA             | C00091  | 0         | 1         | 0         | 0         | 0         | 1   |
|                       |          | Propionyl-CoA            | C00100  | 0         | 0         | 0         | 0         | 0         | 0   |
|                       |          | Inosine-diphosphate      | C00104  | 0         | 0         | 0         | 0         | 0         | 0   |
|                       |          | Anthranilate             | C00108  | 0         | 0         | 0         | 0         | 0         | 0   |
| Fumarate              | C00122   | 0                        | 0       | 1         | 0         | 0         | 1         |           |     |
| Inosine-monophosphate | C00130   | 0                        | 0       | 0         | 0         | 0         | 0         |           |     |

|  |              |                           |        |   |   |   |   |   |   |
|--|--------------|---------------------------|--------|---|---|---|---|---|---|
|  |              | GMP                       | C00144 | 0 | 0 | 0 | 0 | 0 | 0 |
|  |              | Adenine                   | C00147 | 0 | 0 | 0 | 0 | 0 | 0 |
|  |              | Proline                   | C00148 | 0 | 0 | 0 | 0 | 0 | 0 |
|  |              | Malate                    | C00149 | 0 | 0 | 1 | 0 | 0 | 1 |
|  |              | Asparagine                | C00152 | 0 | 0 | 0 | 0 | 0 | 0 |
|  |              | Homocysteine              | C00155 | 0 | 0 | 0 | 0 | 0 | 0 |
|  |              | Citrate                   | C00158 | 0 | 0 | 1 | 0 | 0 | 1 |
|  |              | Phenylpyruvate            | C00166 | 0 | 0 | 0 | 0 | 0 | 0 |
|  |              | UDP-glucuronate           | C00167 | 0 | 0 | 0 | 0 | 0 | 0 |
|  |              | 2,3-Dihydroxybenzoic acid | C00196 | 0 | 0 | 0 | 0 | 0 | 0 |
|  |              | Adenosine                 | C00212 | 0 | 0 | 0 | 0 | 0 | 0 |
|  |              | Acetyl phosphate          | C00227 | 0 | 0 | 0 | 0 | 0 | 0 |
|  |              | Gluconate                 | C00257 | 0 | 0 | 0 | 0 | 0 | 0 |
|  |              | Glycerate                 | C00258 | 0 | 0 | 0 | 0 | 0 | 0 |
|  |              | Uridine                   | C00299 | 0 | 0 | 0 | 0 | 0 | 0 |
|  |              | Citrulline                | C00327 | 0 | 0 | 0 | 0 | 0 | 0 |
|  |              | Acetoacetyl-CoA           | C00332 | 0 | 0 | 0 | 0 | 0 | 0 |
|  |              | Dihydroorotate            | C00337 | 0 | 0 | 0 | 0 | 0 | 0 |
|  |              | 6-phospho-D-gluconate     | C00345 | 0 | 0 | 0 | 0 | 0 | 0 |
|  |              | Glucosamine-6 phosphate   | C00352 | 0 | 0 | 0 | 0 | 0 | 0 |
|  |              | Fructose-1,6-bisphosphate | C00354 | 0 | 0 | 0 | 0 | 0 | 0 |
|  |              | dAMP                      | C00360 | 0 | 0 | 0 | 0 | 0 | 0 |
|  |              | dGMP                      | C00362 | 0 | 0 | 0 | 0 | 0 | 0 |
|  |              | Cytosine                  | C00380 | 0 | 0 | 0 | 0 | 0 | 0 |
|  |              | Guanosine                 | C00387 | 0 | 0 | 0 | 0 | 0 | 0 |
|  |              | Aconitate                 | C00417 | 0 | 0 | 0 | 0 | 0 | 0 |
|  |              | N-acetyl-ornithine        | C00437 | 0 | 0 | 0 | 0 | 0 | 0 |
|  |              | Carbamyl-aspartate        | C00438 | 0 | 0 | 0 | 0 | 0 | 0 |
|  |              | Cytidine                  | C00475 | 0 | 0 | 0 | 0 | 0 | 0 |
|  |              | Shikimate                 | C00493 | 0 | 0 | 0 | 0 | 0 | 0 |
|  |              | ADP-glucose               | C00498 | 0 | 0 | 0 | 0 | 0 | 0 |
|  |              | Cyclic-AMP                | C00575 | 0 | 0 | 0 | 0 | 0 | 0 |
|  |              | Histidinol                | C00860 | 0 | 0 | 0 | 0 | 0 | 0 |
|  |              | Quinolate                 | C03722 | 0 | 0 | 0 | 0 | 0 | 0 |
|  | S.cerevisiae | NADH                      | C00004 | 0 | 0 | 0 | 0 | 0 | 0 |
|  |              | ADP                       | C00008 | 0 | 0 | 0 | 0 | 0 | 0 |
|  |              | AMP                       | C00020 | 0 | 0 | 0 | 0 | 0 | 0 |
|  |              | Pyruvate                  | C00022 | 0 | 0 | 0 | 0 | 0 | 0 |
|  |              | Succinate                 | C00042 | 1 | 0 | 0 | 0 | 0 | 1 |

|                            |        |                             |        |                         |        |   |   |   |   |   |   |
|----------------------------|--------|-----------------------------|--------|-------------------------|--------|---|---|---|---|---|---|
|                            |        | L-Arginine                  | C00062 | 0                       | 0      | 0 | 0 | 0 | 0 |   |   |
|                            |        | L-Glutamine                 | C00064 | 0                       | 0      | 1 | 0 | 0 | 1 |   |   |
|                            |        | Phosphoenolpyruvate         | C00074 | 0                       | 0      | 0 | 0 | 0 | 0 |   |   |
|                            |        | L-Tryptophan                | C00078 | 0                       | 0      | 0 | 0 | 0 | 0 |   |   |
|                            |        | L-Phenylalanine             | C00079 | 0                       | 0      | 0 | 0 | 0 | 0 |   |   |
|                            |        | L-Tyrosine                  | C00082 | 0                       | 0      | 0 | 0 | 0 | 0 |   |   |
|                            |        | D-Fructose 6-phosphate      | C00085 | 0                       | 0      | 0 | 0 | 0 | 0 |   |   |
|                            |        | D-Glucose 6-phosphate       | C00092 | 0                       | 0      | 1 | 0 | 0 | 1 |   |   |
|                            |        | sn-Glycerol-3-phosphate     | C00093 | 0                       | 0      | 0 | 0 | 0 | 0 |   |   |
|                            |        | Glycerone phosphate         | C00111 | 0                       | 0      | 0 | 0 | 0 | 0 |   |   |
|                            |        | Fumarate                    | C00122 | 0                       | 0      | 1 | 0 | 0 | 1 |   |   |
|                            |        | GMP                         | C00144 | 0                       | 0      | 0 | 0 | 0 | 0 |   |   |
|                            |        | Adenine                     | C00147 | 0                       | 0      | 0 | 0 | 0 | 0 |   |   |
|                            |        | Malate                      | C00149 | 0                       | 0      | 1 | 0 | 0 | 1 |   |   |
|                            |        | Citrate                     | C00158 | 0                       | 0      | 1 | 0 | 0 | 1 |   |   |
|                            |        | 6-Phospho-D-gluconate       | C00345 | 0                       | 0      | 0 | 0 | 0 | 0 |   |   |
|                            |        | D-Fructose-1,6-bisphosphate | C00354 | 0                       | 0      | 0 | 0 | 0 | 0 |   |   |
|                            |        | Test Set                    | E.coli | S-adenosyl-L-methionine | C00019 | 0 | 0 | 0 | 0 | 1 | 1 |
|                            |        |                             |        | GDP                     | C00035 | 0 | 0 | 0 | 0 | 0 | 0 |
|                            |        |                             |        | Succinate               | C00042 | 1 | 0 | 0 | 0 | 0 | 1 |
| Glutamine                  | C00064 |                             |        | 0                       | 0      | 1 | 0 | 0 | 1 |   |   |
| Serine                     | C00065 |                             |        | 0                       | 0      | 0 | 0 | 0 | 0 |   |   |
| Tryptophan                 | C00078 |                             |        | 0                       | 0      | 0 | 0 | 0 | 0 |   |   |
| Phenylalanine              | C00079 |                             |        | 0                       | 0      | 0 | 0 | 0 | 0 |   |   |
| Dihydroxy-acetonephosphate | C00111 |                             |        | 0                       | 0      | 0 | 0 | 0 | 0 |   |   |
| PRPP                       | C00119 |                             |        | 0                       | 0      | 0 | 0 | 0 | 0 |   |   |
| Glutathione disulfide      | C00127 |                             |        | 0                       | 0      | 0 | 0 | 0 | 0 |   |   |
| dATP                       | C00131 |                             |        | 0                       | 0      | 0 | 0 | 0 | 0 |   |   |
| Histidine                  | C00135 |                             |        | 0                       | 0      | 0 | 0 | 0 | 0 |   |   |
| Myo-inositol               | C00137 |                             |        | 0                       | 0      | 0 | 0 | 0 | 0 |   |   |
| 4-Hydroxybenzoate          | C00156 |                             |        | 0                       | 0      | 0 | 0 | 0 | 0 |   |   |
| Valine                     | C00183 |                             |        | 0                       | 0      | 0 | 0 | 0 | 0 |   |   |
| Threonine                  | C00188 |                             |        | 0                       | 0      | 0 | 0 | 0 | 0 |   |   |
| 3-Phosphoglycerate         | C00197 |                             |        | 0                       | 0      | 0 | 0 | 0 | 0 |   |   |
| Adenosine-phosphosulfate   | C00224 |                             |        | 0                       | 0      | 0 | 0 | 0 | 0 |   |   |
| Guanine                    | C00242 |                             |        | 0                       | 0      | 0 | 0 | 0 | 0 |   |   |
| Deoxyguanosine             | C00330 |                             |        | 0                       | 0      | 0 | 0 | 0 | 0 |   |   |
| dTDP                       | C00363 | 0                           | 0      | 0                       | 0      | 0 | 0 |   |   |   |   |
| dCTP                       | C00458 | 0                           | 0      | 0                       | 0      | 0 | 0 |   |   |   |   |

|              |                        |        |   |   |   |   |   |   |
|--------------|------------------------|--------|---|---|---|---|---|---|
| S.cerevisiae | dTTP                   | C00459 | 0 | 0 | 0 | 0 | 0 | 0 |
|              | Deoxyadenosine         | C00559 | 0 | 0 | 0 | 0 | 0 | 0 |
|              | ATP                    | C00002 | 0 | 0 | 0 | 1 | 0 | 1 |
|              | NAD+                   | C00003 | 0 | 0 | 0 | 0 | 0 | 0 |
|              | L-Glutamate            | C00025 | 0 | 0 | 1 | 0 | 0 | 1 |
|              | 2-Oxoglutarate         | C00026 | 0 | 0 | 0 | 0 | 0 | 0 |
|              | GDP                    | C00035 | 0 | 0 | 0 | 0 | 0 | 0 |
|              | L-Alanine              | C00041 | 0 | 0 | 0 | 0 | 1 | 1 |
|              | GTP                    | C00044 | 0 | 0 | 0 | 0 | 1 | 1 |
|              | L-Aspartate            | C00049 | 0 | 1 | 0 | 0 | 0 | 1 |
|              | D-Glucose 1-phosphate  | C00103 | 0 | 0 | 0 | 0 | 0 | 0 |
|              | D-Ribose 5-phosphate   | C00117 | 0 | 0 | 0 | 0 | 0 | 0 |
|              | L-Asparagine           | C00152 | 0 | 0 | 0 | 0 | 0 | 0 |
|              | 3-Phospho-D-glycerate  | C00197 | 0 | 0 | 0 | 0 | 0 | 0 |
|              | D-Ribulose 5-phosphate | C00199 | 0 | 0 | 0 | 0 | 0 | 0 |
|              | Isocitrate             | C00311 | 0 | 0 | 0 | 0 | 0 | 0 |
|              | Pantothenate           | C00864 | 0 | 0 | 0 | 0 | 0 | 0 |



**Table S3. Information of predicted and measured concentrations in training set and test set.**

|                       | Organism | Metabolite               | KEGG ID | Ce    | Cp   | Error |
|-----------------------|----------|--------------------------|---------|-------|------|-------|
| Training Set          | E.coli   | ATP                      | C00002  | 2.02  | 2.31 | -0.29 |
|                       |          | NAD                      | C00003  | 2.59  | 2.82 | -0.22 |
|                       |          | NADH                     | C00004  | 4.08  | 3.86 | 0.22  |
|                       |          | ADP                      | C00008  | 3.26  | 3.92 | -0.67 |
|                       |          | Coenzyme-A               | C00010  | 2.86  | 2.64 | 0.22  |
|                       |          | UDP                      | C00015  | 2.75  | 2.53 | 0.22  |
|                       |          | FAD                      | C00016  | 3.76  | 3.98 | -0.22 |
|                       |          | AMP                      | C00020  | 3.55  | 3.75 | -0.20 |
|                       |          | Acetyl-CoA               | C00024  | 3.22  | 3.44 | -0.22 |
|                       |          | Glutamate                | C00025  | 1.02  | 1.27 | -0.26 |
|                       |          | $\alpha$ -Ketoglutarate  | C00026  | 3.35  | 3.47 | -0.12 |
|                       |          | UDP-glucose              | C00029  | 2.60  | 3.02 | -0.41 |
|                       |          | Alanine                  | C00041  | 2.59  | 2.37 | 0.22  |
|                       |          | UDP-N-acetyl-glucosamine | C00043  | 2.03  | 3.10 | -1.06 |
|                       |          | GTP                      | C00044  | 2.31  | 2.09 | 0.22  |
|                       |          | lysine                   | C00047  | 3.39  | 3.62 | -0.22 |
|                       |          | Aspartate                | C00049  | 2.37  | 2.15 | 0.22  |
|                       |          | Glutathione              | C00051  | 1.78  | 2.00 | -0.22 |
|                       |          | CMP                      | C00055  | 3.44  | 3.52 | -0.07 |
|                       |          | Flavin mononucleotide    | C00061  | 4.27  | 4.05 | 0.22  |
|                       |          | Arginine                 | C00062  | 3.24  | 3.02 | 0.22  |
|                       |          | CTP                      | C00063  | 2.56  | 2.57 | -0.01 |
|                       |          | Methionine               | C00073  | 3.84  | 3.62 | 0.22  |
|                       |          | Phosphoenolpyruvate      | C00074  | 3.74  | 3.62 | 0.12  |
|                       |          | UTP                      | C00075  | 2.08  | 2.36 | -0.27 |
|                       |          | Ornithine                | C00077  | 5.00  | 3.43 | 1.56  |
|                       |          | Inosine-triphosphate     | C00081  | 3.69  | 3.47 | 0.22  |
|                       |          | Tyrosine                 | C00082  | 4.54  | 4.27 | 0.27  |
|                       |          | Malonyl-CoA              | C00083  | 4.45  | 4.23 | 0.22  |
|                       |          | Succinyl-CoA             | C00091  | 3.63  | 3.45 | 0.18  |
|                       |          | Propionyl-CoA            | C00100  | 5.27  | 4.67 | 0.60  |
|                       |          | Inosine-diphosphate      | C00104  | 4.62  | 3.78 | 0.85  |
|                       |          | Anthranilate             | C00108  | 5.46  | 4.85 | 0.61  |
| Fumarate              | C00122   | 3.94                     | 3.72    | 0.22  |      |       |
| Inosine-monophosphate | C00130   | 3.57                     | 3.81    | -0.25 |      |       |

|  |              |                           |        |      |      |       |
|--|--------------|---------------------------|--------|------|------|-------|
|  |              | GMP                       | C00144 | 4.63 | 3.82 | 0.80  |
|  |              | Adenine                   | C00147 | 5.83 | 5.47 | 0.37  |
|  |              | Proline                   | C00148 | 3.41 | 3.64 | -0.22 |
|  |              | Malate                    | C00149 | 2.77 | 2.77 | 0.01  |
|  |              | Asparagine                | C00152 | 3.29 | 3.51 | -0.22 |
|  |              | Homocysteine              | C00155 | 3.43 | 3.63 | -0.20 |
|  |              | Citrate                   | C00158 | 2.71 | 2.54 | 0.17  |
|  |              | Phenylpyruvate            | C00166 | 4.05 | 4.27 | -0.22 |
|  |              | UDP-glucuronate           | C00167 | 3.25 | 3.23 | 0.02  |
|  |              | 2,3-Dihydroxybenzoic acid | C00196 | 3.86 | 5.18 | -1.32 |
|  |              | Adenosine                 | C00212 | 6.88 | 5.73 | 1.16  |
|  |              | Acetyl phosphate          | C00227 | 2.97 | 3.24 | -0.27 |
|  |              | Gluconate                 | C00257 | 4.38 | 3.99 | 0.39  |
|  |              | Glycerate                 | C00258 | 2.85 | 3.75 | -0.89 |
|  |              | Uridine                   | C00299 | 2.68 | 4.16 | -1.48 |
|  |              | Citrulline                | C00327 | 2.87 | 3.32 | -0.45 |
|  |              | Acetoacetyl-CoA           | C00332 | 4.66 | 4.44 | 0.22  |
|  |              | Dihydroorotate            | C00337 | 4.92 | 4.74 | 0.19  |
|  |              | 6-phospho-D-gluconate     | C00345 | 2.42 | 2.77 | -0.35 |
|  |              | Glucosamine-6 phosphate   | C00352 | 2.94 | 3.64 | -0.70 |
|  |              | Fructose-1,6-bisphosphate | C00354 | 1.82 | 2.04 | -0.22 |
|  |              | dAMP                      | C00360 | 5.05 | 4.75 | 0.30  |
|  |              | dGMP                      | C00362 | 4.29 | 4.30 | -0.01 |
|  |              | Cytosine                  | C00380 | 4.85 | 4.26 | 0.59  |
|  |              | Guanosine                 | C00387 | 5.79 | 5.18 | 0.61  |
|  |              | Aconitate                 | C00417 | 4.79 | 4.46 | 0.33  |
|  |              | N-acetyl-ornithine        | C00437 | 4.36 | 3.21 | 1.16  |
|  |              | Carbamyl-aspartate        | C00438 | 3.23 | 3.71 | -0.48 |
|  |              | Cytidine                  | C00475 | 5.59 | 4.84 | 0.75  |
|  |              | Shikimate                 | C00493 | 4.85 | 4.63 | 0.22  |
|  |              | ADP-glucose               | C00498 | 5.37 | 4.61 | 0.76  |
|  |              | Cyclic-AMP                | C00575 | 4.45 | 4.68 | -0.22 |
|  |              | Histidinol                | C00860 | 4.89 | 4.63 | 0.26  |
|  |              | Quinolate                 | C03722 | 4.94 | 4.72 | 0.22  |
|  | S.cerevisiae | NADH                      | C00004 | 3.35 | 4.09 | -0.75 |
|  |              | ADP                       | C00008 | 3.20 | 3.42 | -0.22 |
|  |              | AMP                       | C00020 | 3.80 | 3.57 | 0.22  |
|  |              | Pyruvate                  | C00022 | 2.91 | 2.68 | 0.22  |
|  |              | Succinate                 | C00042 | 3.47 | 3.25 | 0.22  |

|                           |        |                             |        |                         |        |       |      |       |
|---------------------------|--------|-----------------------------|--------|-------------------------|--------|-------|------|-------|
|                           |        | L-Arginine                  | C00062 | 1.45                    | 3.02   | -1.58 |      |       |
|                           |        | L-Glutamine                 | C00064 | 1.09                    | 2.41   | -1.32 |      |       |
|                           |        | Phosphoenolpyruvate         | C00074 | 3.72                    | 3.62   | 0.11  |      |       |
|                           |        | L-Tryptophan                | C00078 | 4.52                    | 4.63   | -0.11 |      |       |
|                           |        | L-Phenylalanine             | C00079 | 3.46                    | 4.41   | -0.95 |      |       |
|                           |        | L-Tyrosine                  | C00082 | 3.80                    | 4.33   | -0.54 |      |       |
|                           |        | D-Fructose 6-phosphate      | C00085 | 3.49                    | 3.45   | 0.04  |      |       |
|                           |        | D-Glucose 6-phosphate       | C00092 | 2.43                    | 2.48   | -0.05 |      |       |
|                           |        | sn-Glycerol 3-phosphate     | C00093 | 3.30                    | 3.08   | 0.22  |      |       |
|                           |        | Glycerone phosphate         | C00111 | 3.14                    | 3.24   | -0.10 |      |       |
|                           |        | Fumarate                    | C00122 | 2.78                    | 3.73   | -0.95 |      |       |
|                           |        | GMP                         | C00144 | 4.22                    | 3.78   | 0.44  |      |       |
|                           |        | Adenine                     | C00147 | 4.30                    | 5.59   | -1.29 |      |       |
|                           |        | Malate                      | C00149 | 2.77                    | 2.77   | 0.01  |      |       |
|                           |        | Citrate                     | C00158 | 2.83                    | 2.61   | 0.22  |      |       |
|                           |        | 6-Phospho-D-gluconate       | C00345 | 3.06                    | 2.84   | 0.22  |      |       |
|                           |        | D-Fructose 1,6-bisphosphate | C00354 | 2.06                    | 2.04   | 0.02  |      |       |
|                           |        | Test Set                    | E.coli | S-adenosyl-L-methionine | C00019 | 3.74  | 3.68 | 0.06  |
|                           |        |                             |        | GDP                     | C00035 | 3.17  | 3.21 | -0.04 |
|                           |        |                             |        | Succinate               | C00042 | 3.24  | 3.05 | 0.20  |
| Glutamine                 | C00064 |                             |        | 2.42                    | 2.36   | 0.06  |      |       |
| Serine                    | C00065 |                             |        | 4.17                    | 3.64   | 0.53  |      |       |
| Tryptophan                | C00078 |                             |        | 4.92                    | 4.69   | 0.23  |      |       |
| Phenylalanine             | C00079 |                             |        | 4.74                    | 4.35   | 0.39  |      |       |
| Dihydroxyacetonephosphate | C00111 |                             |        | 3.43                    | 2.89   | 0.53  |      |       |
| PRPP                      | C00119 |                             |        | 3.59                    | 3.23   | 0.36  |      |       |
| Glutathione disulfide     | C00127 |                             |        | 2.63                    | 2.87   | -0.25 |      |       |
| dATP                      | C00131 |                             |        | 4.81                    | 4.19   | 0.62  |      |       |
| Histidine                 | C00135 |                             |        | 4.17                    | 3.79   | 0.38  |      |       |
| Myo-inositol              | C00137 |                             |        | 5.24                    | 4.94   | 0.30  |      |       |
| 4-Hydroxybenzoate         | C00156 |                             |        | 4.28                    | 4.66   | -0.38 |      |       |
| Valine                    | C00183 |                             |        | 2.40                    | 3.59   | -1.19 |      |       |
| Threonine                 | C00188 |                             |        | 3.75                    | 3.52   | 0.23  |      |       |
| 3-Phosphoglycerate        | C00197 |                             |        | 2.81                    | 3.45   | -0.63 |      |       |
| Adenosine-phosphosulfate  | C00224 |                             |        | 5.18                    | 4.66   | 0.52  |      |       |
| Guanine                   | C00242 |                             |        | 3.73                    | 4.97   | -1.24 |      |       |
| Deoxyguanosine            | C00330 |                             |        | 6.28                    | 5.28   | 1.00  |      |       |
| dTDP                      | C00363 | 3.42                        | 3.29   | 0.13                    |        |       |      |       |
| dCTP                      | C00458 | 4.46                        | 2.55   | 1.91                    |        |       |      |       |

|  |              |                        |        |      |      |       |
|--|--------------|------------------------|--------|------|------|-------|
|  |              | dTTP                   | C00459 | 2.34 | 3.33 | -1.00 |
|  |              | Deoxyadenosine         | C00559 | 5.55 | 6.04 | -0.49 |
|  | S.cerevisiae | ATP                    | C00002 | 2.47 | 2.08 | 0.39  |
|  |              | NAD+                   | C00003 | 3.33 | 2.86 | 0.46  |
|  |              | L-Glutamate            | C00025 | 1.09 | 1.52 | -0.44 |
|  |              | 2-Oxoglutarate         | C00026 | 2.95 | 3.36 | -0.40 |
|  |              | GDP                    | C00035 | 3.66 | 3.21 | 0.45  |
|  |              | L-Alanine              | C00041 | 1.61 | 2.42 | -0.81 |
|  |              | GTP                    | C00044 | 3.23 | 2.02 | 1.21  |
|  |              | L-Aspartate            | C00049 | 1.80 | 2.41 | -0.60 |
|  |              | D-Glucose 1-phosphate  | C00103 | 4.05 | 3.49 | 0.56  |
|  |              | D-Ribose 5-phosphate   | C00117 | 3.39 | 3.20 | 0.18  |
|  |              | L-Asparagine           | C00152 | 2.33 | 3.80 | -1.47 |
|  |              | 3-Phospho-D-glycerate  | C00197 | 3.05 | 3.45 | -0.39 |
|  |              | D-Ribulose 5-phosphate | C00199 | 4.70 | 3.14 | 1.56  |
|  |              | Isocitrate             | C00311 | 3.72 | 3.22 | 0.50  |
|  |              | Pantothenate           | C00864 | 3.68 | 3.63 | 0.05  |



|                              |        |          |            |    |            |           |             |           |           |   |          |           |   |        |       |   |
|------------------------------|--------|----------|------------|----|------------|-----------|-------------|-----------|-----------|---|----------|-----------|---|--------|-------|---|
| L-Asparagine                 | C00152 | 4.66E-03 | 0          | 2  | 0.33203515 | 2.7589712 | -0.45936516 | 8.5307722 | 0         | 0 | 22.50805 | 0         | 0 | -3.544 | 0.152 | 0 |
| Citrate                      | C00158 | 1.47E-03 | 0.33333333 | 3  | 0.28641728 | 2.8216975 | -0.70779455 | 63.881168 | 0         | 0 | 31.61699 | 0         | 0 | -1.998 | 0.126 | 1 |
| 3-Phospho-D-glycerate        | C00197 | 8.90E-04 | 0          | 3  | 0.22090781 | 2.7090659 | -0.68446761 | 8.5307722 | 0         | 0 | 30.51699 | 15.676527 | 0 | -2.337 | 0.186 | 0 |
| D-Ribulose 5-phosphate       | C00199 | 2.00E-05 | 0          | 5  | 0.42681855 | 2.8199623 | -0.57482624 | 8.5307722 | 0         | 0 | 61.03399 | 15.676527 | 0 | -3.058 | 0.152 | 0 |
| Isocitrate                   | C00311 | 1.90E-04 | 0.0952381  | 7  | 0.4389635  | 2.8126755 | -0.70789599 | 42.213158 | 0         | 0 | 26.47555 | 0         | 0 | -2.072 | 0.112 | 0 |
| 6-Phospho-D-gluconate        | C00345 | 8.70E-04 | 0          | 2  | 0.45794708 | 2.8827114 | -0.67311466 | 8.5307722 | 0         | 0 | 55.89255 | 15.676527 | 0 | -4.157 | 0.122 | 0 |
| D-Fructose 1,6-bisphosphate  | C00354 | 8.76E-03 | 1          | 2  | 0.35713339 | 2.9941537 | -0.67311382 | 32.012836 | 0         | 1 | 69.49251 | 31.353054 | 0 | -4.186 | 0.107 | 0 |
| Pantothenate                 | C00864 | 2.10E-04 | 0          | 2  | 0.34613365 | 2.923965  | -0.43633202 | 79.255997 | 12.949531 | 0 | 125.4419 | 66.652031 | 0 | -1.494 | 0.115 | 0 |
| L-Serine                     | C00065 | 0.00077  | 0          | 6  | 0.39069223 | 2.7133796 | -0.44136977 | 0         | 0         | 0 | 28.75803 | 0         | 0 | -2.811 | 0.187 | 0 |
| D-Glucose 1-phosphate        | C00103 | 0.00023  | 0          | 7  | 0.50497961 | 2.9663177 | -0.55763352 | 39.541901 | 0         | 1 | 55.89255 | 15.676527 | 1 | -2.677 | 0.136 | 0 |
| D-Ribose 5-phosphate         | C00117 | 0.00024  | 0          | 5  | 0.49509793 | 2.9520912 | -0.629421   | 8.5307722 | 0         | 1 | 47.43403 | 15.676527 | 0 | -3.131 | 0.154 | 0 |
| D-Glyceraldehyde 3-phosphate | C00118 | 0.00012  | 0.04444444 | 10 | 0.2391061  | 2.7103465 | -0.63274568 | 8.5307722 | 0         | 0 | 30.51699 | 15.676527 | 0 | -2.131 | 0.213 | 0 |
| L-Leucine                    | C00123 | 0.00123  | 0          | 1  | 0.2142     | 2.8748624 | -0.33988363 | 47.089787 | 0         | 0 | 83.53349 | 66.652031 | 0 | -1.667 | 0.22  | 1 |
| L-Valine                     | C00183 | 0.00601  | 0          | 1  | 0.2142     | 2.8494208 | -0.31706995 | 29.857702 | 0         | 0 | 67.72499 | 66.652031 | 0 | -2.286 | 0.231 | 0 |
| (S)-Lactate                  | C00186 | 0.00369  | 0          | 1  | 0.31986156 | 2.6253042 | -0.57461077 | 12.796158 | 0         | 0 | 37.86697 | 33.326015 | 0 | -0.734 | 0.248 | 0 |
| L-Threonine                  | C00188 | 0.00081  | 0          | 3  | 0.36300907 | 2.7927809 | -0.3988986  | 12.796158 | 0         | 0 | 44.56652 | 33.326015 | 0 | -2.502 | 0.183 | 0 |
| D-Ribulose 5-phosphate       | C00199 | 0.00043  | 0          | 5  | 0.42681855 | 2.8199623 | -0.57482624 | 8.5307722 | 0         | 0 | 61.03399 | 15.676527 | 0 | -3.058 | 0.152 | 0 |
| Isocitrate                   | C00311 | 0.00026  | 0.2        | 5  | 0.4389635  | 2.8126755 | -0.70789599 | 42.213158 | 0         | 0 | 26.47555 | 0         | 0 | -2.072 | 0.112 | 0 |
| L-Isoleucine                 | C00407 | 0.00037  | 0          | 1  | 0.2142     | 2.8866551 | -0.31279653 | 38.388474 | 0         | 0 | 83.53349 | 66.652031 | 0 | -1.757 | 0.22  | 0 |

Bacillus subtilis

**Figure S1. Distribution of predictive errors in both training set (a) and test set (b).**

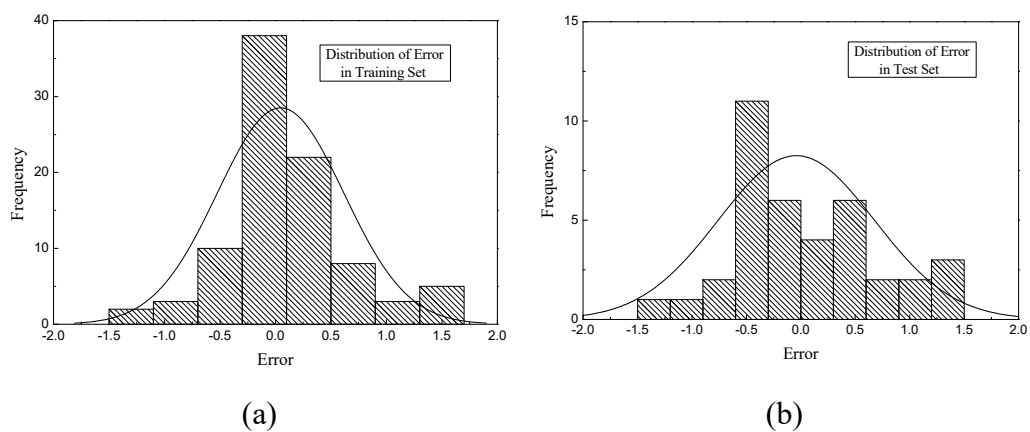

Supplement: 41598_2017_8793_MOESM1_ESM.pdf [file 41598_2017_8793_MOESM1_ESM.pdf]
